# Supplementary material for: Multilocus Sequence Typing as a Replacement for Serotyping in Salmonella enterica
Source: PLOS journal article supplement (doi:10.1371/journal.ppat.1002776), 2012-06-21
Supplement: S3 (10.1371/journal.ppat.1002776.s003) [file journal.ppat.1002776.s003]

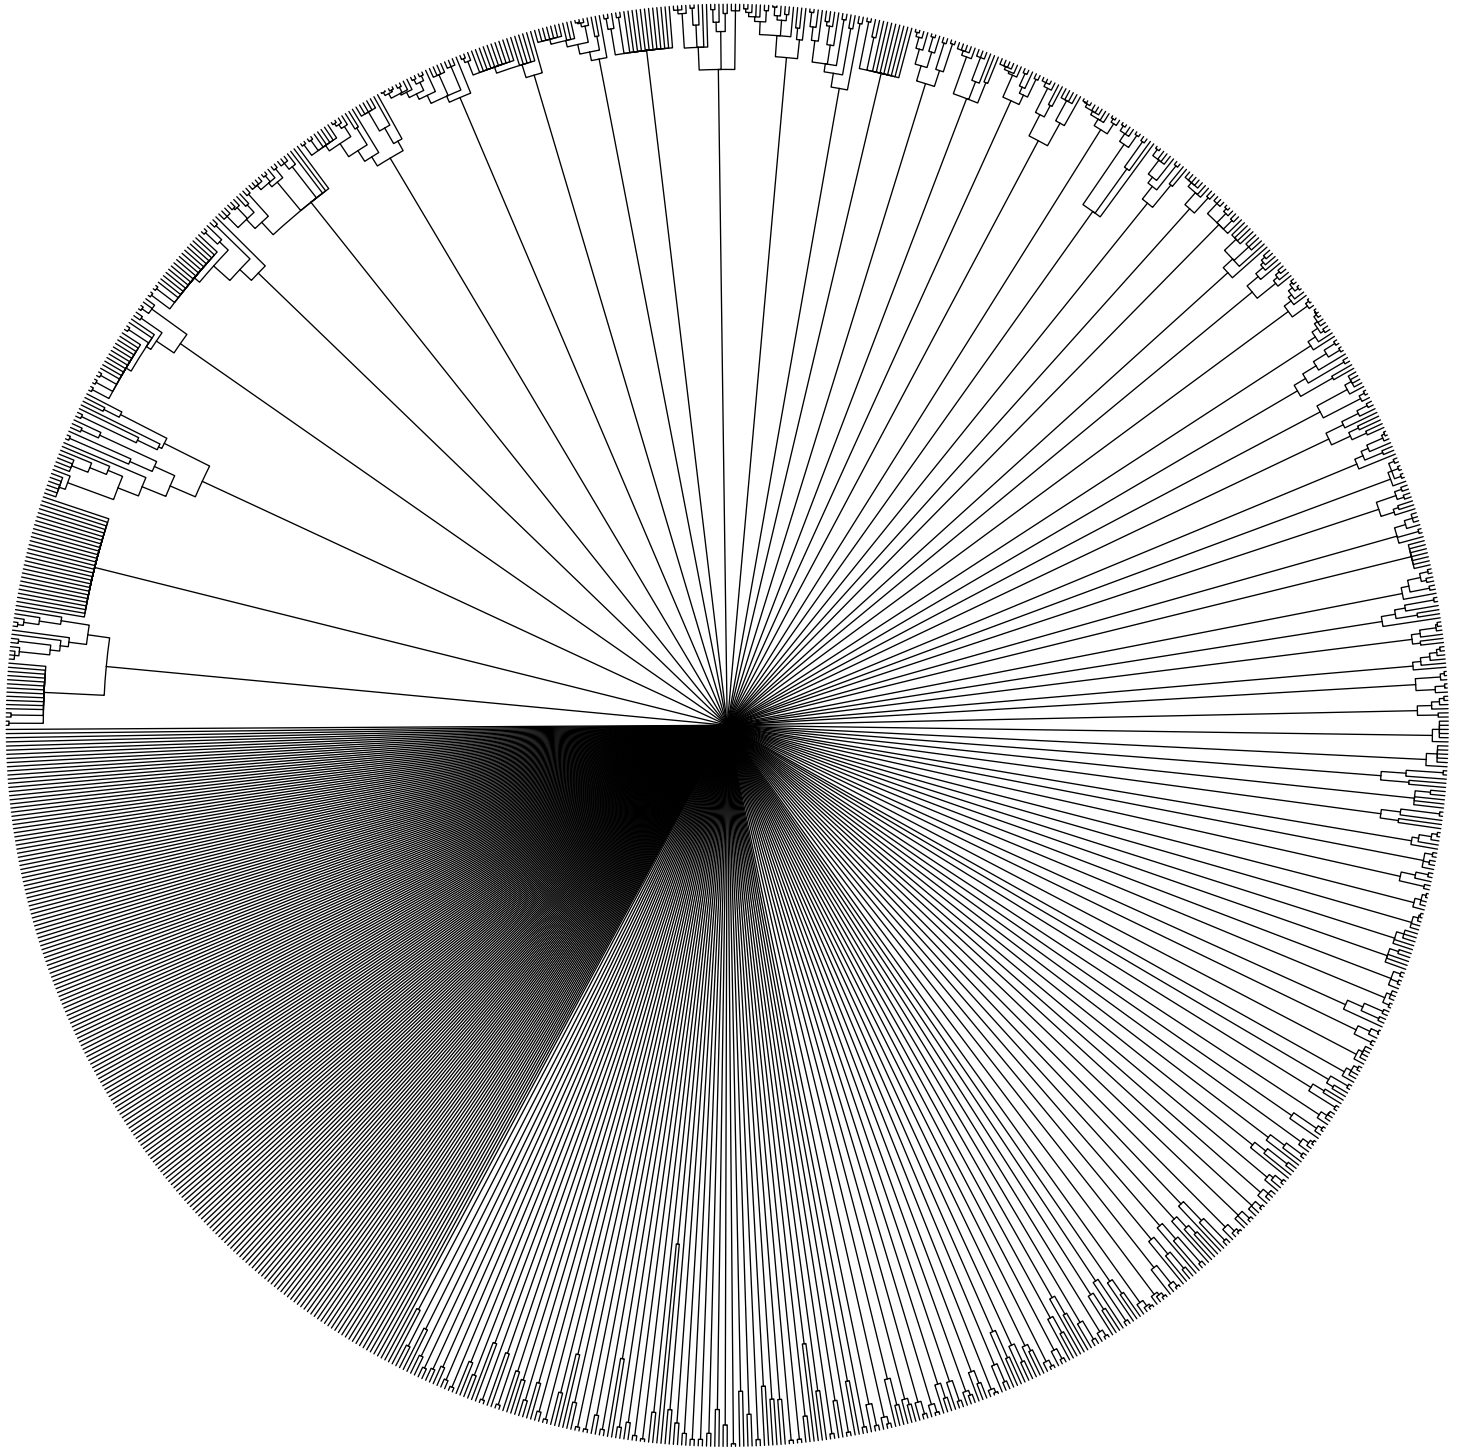

Supplementary Figure 3. Radial dendrogram of 163 clusters of STs and 189 singleton STs found by ClonalFrame among concatenated sequences of seven housekeeping genes from 1092 STs of *S. enterica* subspecies *enterica*. Each line represents a distinct ST, and groups of related STs are seen at the periphery of the dendrogram.
