# Supplementary material for: Multilocus Sequence Typing as a Replacement for Serotyping in Salmonella enterica
Source: PLOS journal article supplement (doi:10.1371/journal.ppat.1002776), 2012-06-21
Supplement: S8 (10.1371/journal.ppat.1002776.s008) [file journal.ppat.1002776.s008]

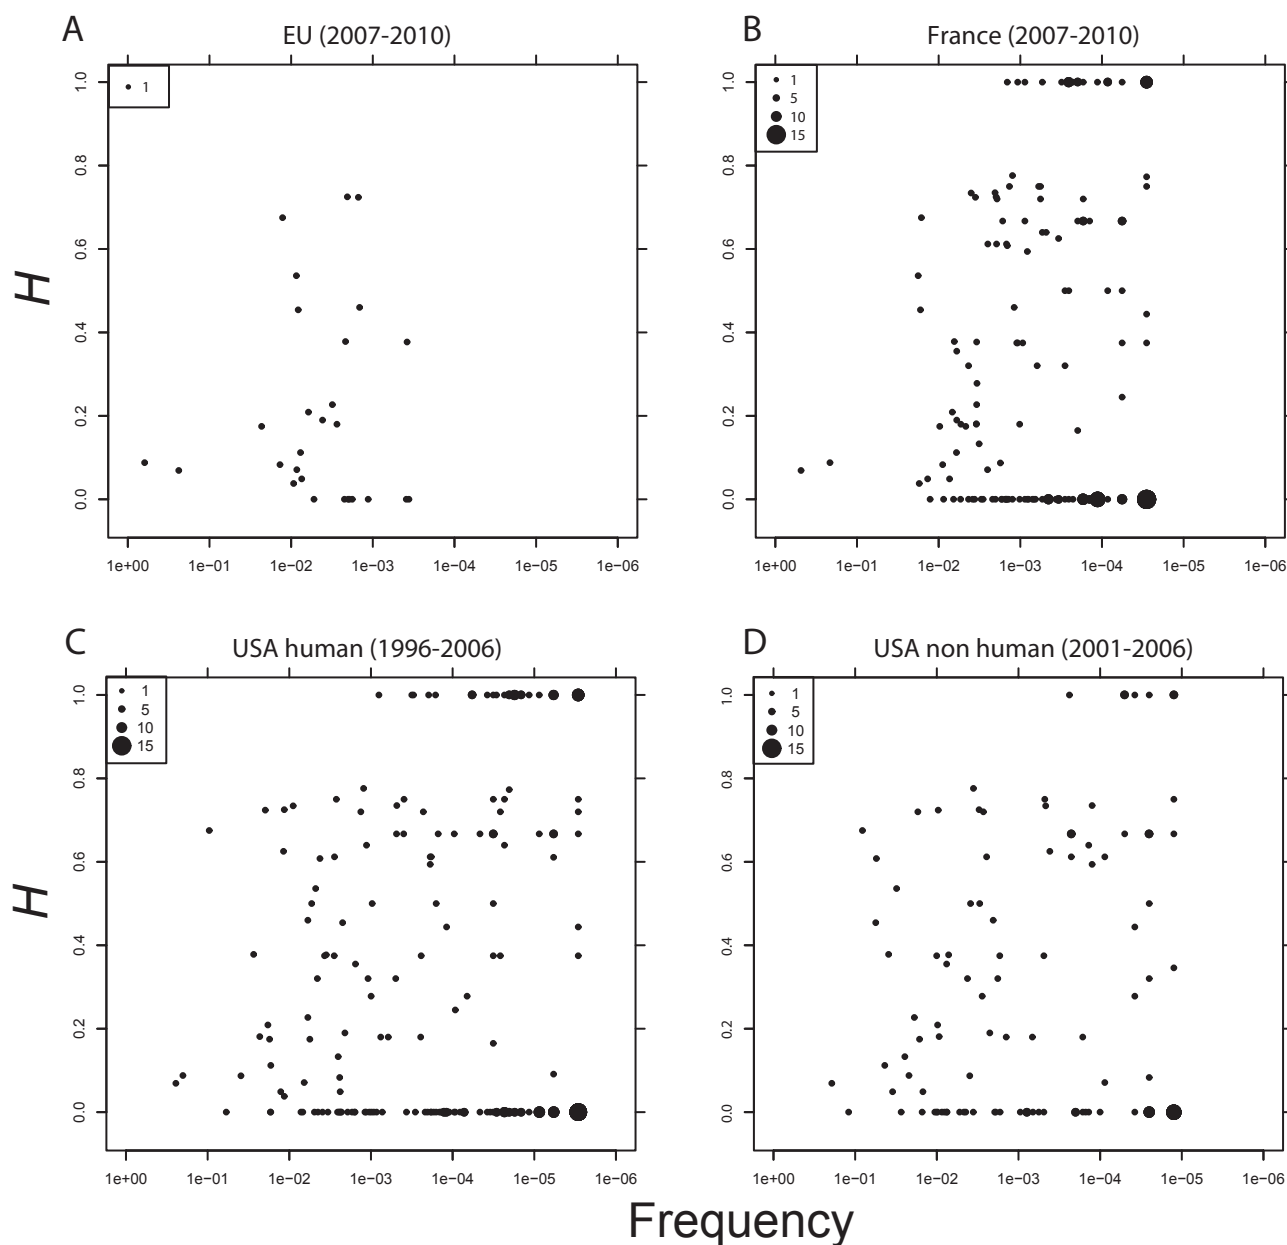

Supplementary Figure 8. Diversity versus frequency of *S. enterica* subspecies *enterica* isolates in France, the EU and the USA. Frequencies of serovars in pooled data over several years are plotted semi-logarithmically against  $H$  for each serovar as in Fig. S2. For parts B-D, all serovars are included and the numbers of discrete serovars at each position is indicated by different sized circles (see legend). Part A is based on the 29 most common serovars, none of which overlapped within the scattergram. Data were obtained from <http://www.ecdc.europa.eu/en/activities/surveillance/TESSy/Pages/TESSy.aspx> (A), internal records at the French National Reference Center for Salmonella, Institut Pasteur (B), as well as <http://www.cdc.gov/ncidod/dbmd/phlisdata/salmonella.htm> (C, D).
