# Supplementary material for: Multilocus Sequence Typing as a Replacement for Serotyping in Salmonella enterica
Source: PLoS Pathog. 2012 Jun 21;8(6):e1002776. doi: 10.1371/journal.ppat.1002776 (PMC3380943; doi:10.1371/journal.ppat.1002776)
Supplement: Table S7 — Properties of supposed 6,7:c:1,5 isolates. (XLSX) [file ppat.1002776.s015.xlsx]

## Sheet: SuppTabB10022011
				Table S7. Properties of supposed 6,7:c:1,5 isolates
Strain	Alternate Designation	HOST	YEAR	COUNTRY	Original Serotype from source lab	Revised Serotype	ST	Group	aroC	dnaN	hemD	hisD	purE	sucA	thrA	SPI-7	Dulcitol	Mucate	H2S	Tartrate	fliC	fljB
E255	SGSC4846	Human	1983	India	Paratyphi C	Bareilly	203		81	69	36	12	68	12	17	ND
SARB50	RKS4620;IP4/77	Human	1977	France	Paratyphi C	Oranienburg	91	204	49	11	25	15	12	15	4	NG
00-01048		Swine	2000	India	Choleraesuis	Choleraesuis s.s.	68	6	36	31	35	14	26	34	8	ND	-	-	-	+
00-01049		Swine	2000	India	Choleraesuis	Choleraesuis s.s.	68	6	36	31	35	14	26	34	8	ND	-	-	-	+
08-8831		Human	2008	China	Choleraesuis var. s.s.	Choleraesuis s.s.	68	6	36	31	35	14	26	34	8	ND	-	-	-	ND
410-67 Peru			1967	Peru	Choleraesuis var. s.s.	Choleraesuis s.s.	68	6	36	31	35	14	26	34	8	ND	-	-	-	+
6631/88	WS0849	Human	1988	Peru	Choleraesuis var. s.s.	Choleraesuis s.s.	68	6	36	31	35	14	26	34	8	ND	-	-	-	+	C	C
8538/96	WS0842	Human	1996	Austria	Choleraesuis var. s.s.	Choleraesuis s.s.	68	6	36	31	35	14	26	34	8	ND	-	-	-	+	C	C
96-02404	SGSC4856	Swine			Choleraesuis	Choleraesuis s.s.	68	6	36	31	35	14	26	34	8	SPI7-	-	-	-	+
97-01180		Human	1997	Austria	Choleraesuis	Choleraesuis s.s.	68	6	36	31	35	14	26	34	8	ND	-	-	-	+
97-01185		Human	1996		Choleraesuis	Choleraesuis s.s.	68	6	36	31	35	14	26	34	8	ND	-	-	-	+
RKS1232	SGSC4874		1980	USA	Choleraesuis var. s.s.	Choleraesuis s.s.	68	6	36	31	35	14	26	34	8	SPI7-	-	-	-	+
RKS1233	SGSC4875		1981	Sweden	Choleraesuis var. s.s.	Choleraesuis s.s.	68	6	36	31	35	14	26	34	8	SPI7-	-	-	-	+
RKS1245	SGSC4885		1966	USA	Choleraesuis var. s.s.	Choleraesuis s.s.	68	6	36	31	35	14	26	34	8	SPI7-	-	-	-	+
RKS1248	SGSC4886			Thailand	Choleraesuis var. s.s.	Choleraesuis s.s.	68	6	36	31	35	14	26	34	8	SPI7-	-	-	-	+
SARB6	RKS3169;CDC3327/54;SGSC2463		1954	Thailand	Choleraesuis var. s.s.	Choleraesuis s.s.	68	6	36	31	35	14	26	34	8	SPI7-	-	-	-	+
34K	WS0649	Swine	<1939	Denmark	Choleraesuis var. s.s.	Choleraesuis s.s.	139	6	36	31	57	14	26	34	8	ND	-	-	-	+	C	C
49-0554	SGSC4909		1949		Choleraesuis var. s.s.	Choleraesuis s.s.	139	6	36	31	57	14	26	34	8	SPI7-	-	-	-	+
RKS1249	SGSC4887			Thailand	Choleraesuis var. s.s.	Choleraesuis s.s.	139	6	36	31	57	14	26	34	8	SPI7-	-	-	-	+
RKS1252	SGSC4890		1979	Norway	Choleraesuis var. Kunzendorf	Choleraesuis s.s.	139	6	36	31	57	14	26	34	8	SPI7-	-	-	-	+
RKS1257	SGSC4893		1981	USA	Choleraesuis var. s.s.	Choleraesuis s.s.	139	6	36	31	57	14	26	34	8	SPI7-	-	-	-	+
8629/96	WS0843		1994	USA	Choleraesuis var. Kunzendorf	Choleraesuis s.s.	145	6	36	31	35	14	26	6	8	ND	-	-	-	ND	A	C
8721/97	1062/94;h(2)		1997	USA	Choleraesuis var. Kunzendorf	Choleraesuis var Kunzendorf	66	6	34	31	35	14	26	6	8	ND	-	-	+	ND
9520/04	WS0852;SC-B43	Human	2004	Taiwan	Choleraesuis var. Kunzendorf	Choleraesuis var Kunzendorf	66	6	34	31	35	14	26	6	8	ND	-	-	+	ND	A	C
B27	SGSC4762	Human	2001	Taiwan	Choleraesuis var. Kunzendorf	Choleraesuis var Kunzendorf	66	6	34	31	35	14	26	6	8	SPI7-	-	-	+	ND
CC5001	SGSC4771	Swine	2003	Taiwan	Choleraesuis var. Kunzendorf	Choleraesuis var Kunzendorf	66	6	34	31	35	14	26	6	8	SPI7-	-	-	+	ND
CC5002	SGSC4772	Swine	2002	Taiwan	Choleraesuis var. Kunzendorf	Choleraesuis var Kunzendorf	66	6	34	31	35	14	26	6	8	SPI7-	-	-	+	ND
CC5003	SGSC4773	Swine	2002	Taiwan	Choleraesuis var. Kunzendorf	Choleraesuis var Kunzendorf	66	6	34	31	35	14	26	6	8	SPI7-	-	-	+	ND
CC5005	SGSC4774	Swine	2001	Taiwan	Choleraesuis var. Kunzendorf	Choleraesuis var Kunzendorf	66	6	34	31	35	14	26	6	8	SPI7-	-	-	+	ND
CC5011	SGSC4780	Swine	2003	Taiwan	Choleraesuis var. Kunzendorf	Choleraesuis var Kunzendorf	66	6	34	31	35	14	26	6	8	SPI7-	-	-	+	ND
CC5012	SGSC4781	Swine	2003	Taiwan	Choleraesuis var. Kunzendorf	Choleraesuis var Kunzendorf	66	6	34	31	35	14	26	6	8	SPI7-	-	-	+	ND
CC5014	SGSC4783	Swine	2003	Taiwan	Choleraesuis var. Kunzendorf	Choleraesuis var Kunzendorf	66	6	34	31	35	14	26	6	8	SPI7-	-	-	+	ND
CC5016	SGSC4785	Swine	2003	Taiwan	Choleraesuis var. Kunzendorf	Choleraesuis var Kunzendorf	66	6	34	31	35	14	26	6	8	SPI7-	-	-	+	ND
CC5017	SGSC4785	Swine	2003	Taiwan	Choleraesuis var. Kunzendorf	Choleraesuis var Kunzendorf	66	6	34	31	35	14	26	6	8	SPI7-	-	-	+	ND
CC5019	SGSC4787	Swine	2003	Taiwan	Choleraesuis var. Kunzendorf	Choleraesuis var Kunzendorf	66	6	34	31	35	14	26	6	8	SPI7-	-	-	+	ND
CC5020	SGSC4788	Swine	2003	Taiwan	Choleraesuis var. Kunzendorf	Choleraesuis var Kunzendorf	66	6	34	31	35	14	26	6	8	SPI7-	-	-	+	ND
CN101	SGSC4789	Swine	1998	Taiwan	Choleraesuis var. Kunzendorf	Choleraesuis var Kunzendorf	66	6	34	31	35	14	26	6	8	SPI7-	-	-	+	ND
CN108	SGSC4791	Swine	1998	Taiwan	Choleraesuis var. Kunzendorf	Choleraesuis var Kunzendorf	66	6	34	31	35	14	26	6	8	SPI7-	-	-	+	ND
CN119	SGSC4793	Swine	1999	Taiwan	Choleraesuis var. Kunzendorf	Choleraesuis var Kunzendorf	66	6	34	31	35	14	26	6	8	SPI7-	-	-	+	ND
CN124	SGSC4794	Swine	1999	Taiwan	Choleraesuis var. Kunzendorf	Choleraesuis var Kunzendorf	66	6	34	31	35	14	26	6	8	SPI7-	-	-	+	ND
CN153	SGSC4795	Swine	2000	Taiwan	Choleraesuis var. Kunzendorf	Choleraesuis var Kunzendorf	66	6	34	31	35	14	26	6	8	SPI7-	-	-	+	ND
CN180	SGSC4799	Swine	2000	Taiwan	Choleraesuis var. Kunzendorf	Choleraesuis var Kunzendorf	66	6	34	31	35	14	26	6	8	SPI7-	-	-	+	ND
CN182	SGSC4800	Swine	2000	Taiwan	Choleraesuis var. Kunzendorf	Choleraesuis var Kunzendorf	66	6	34	31	35	14	26	6	8	SPI7-	-	-	+	ND
CN190	SGSC4702	Swine	2000	Taiwan	Choleraesuis var. Kunzendorf	Choleraesuis var Kunzendorf	66	6	34	31	35	14	26	6	8	SPI7-	-	-	+	ND
CN191	SGSC4803	Swine	2000	Taiwan	Choleraesuis var. Kunzendorf	Choleraesuis var Kunzendorf	66	6	34	31	35	14	26	6	8	SPI7-	-	-	+	ND
CN207	SGSC4805	Swine	2001	Taiwan	Choleraesuis var. Kunzendorf	Choleraesuis var Kunzendorf	66	6	34	31	35	14	26	6	8	SPI7-	-	-	+	ND
CN208	SGSC4806	Swine	2000	Taiwan	Choleraesuis var. Kunzendorf	Choleraesuis var Kunzendorf	66	6	34	31	35	14	26	6	8	SPI7-	-	-	+	ND
CN210	SGSC4807	Swine	2001	Taiwan	Choleraesuis var. Kunzendorf	Choleraesuis var Kunzendorf	66	6	34	31	35	14	26	6	8	SPI7-	-	-	+	ND
CN231	SGSC4808	Swine	2002	Taiwan	Choleraesuis var. Kunzendorf	Choleraesuis var Kunzendorf	66	6	34	31	35	14	26	6	8	SPI7-	-	-	+	ND	A	C
CN650	SGSC4763	Human	2000	Taiwan	Choleraesuis var. Kunzendorf	Choleraesuis var Kunzendorf	66	6	34	31	35	14	26	6	8	SPI7-	-	-	+	ND
CN652	SGSC4764	Human	2000	Taiwan	Choleraesuis var. Kunzendorf	Choleraesuis var Kunzendorf	66	6	34	31	35	14	26	6	8	SPI7-	-	-	+	ND
CY1	SGSC4752	Human	2002	Taiwan	Choleraesuis var. Kunzendorf	Choleraesuis var Kunzendorf	66	6	34	31	35	14	26	6	8	SPI7-	-	-	+	ND	A	C
CY2	SGSC4753	Human	2002	Taiwan	Choleraesuis var. Kunzendorf	Choleraesuis var Kunzendorf	66	6	34	31	35	14	26	6	8	SPI7-	-	-	+	ND
CY3	SGSC4754	Human	2002	Taiwan	Choleraesuis var. Kunzendorf	Choleraesuis var Kunzendorf	66	6	34	31	35	14	26	6	8	SPI7-	-	-	+	ND
CY4	SGSC4755	Human	2002	Taiwan	Choleraesuis var. Kunzendorf	Choleraesuis var Kunzendorf	66	6	34	31	35	14	26	6	8	SPI7-	-	-	+	ND
CY5	SGSC4756	Human	2002	Taiwan	Choleraesuis var. Kunzendorf	Choleraesuis var Kunzendorf	66	6	34	31	35	14	26	6	8	SPI7-	-	-	+	ND
CY8	SGSC4758	Human	2002	Taiwan	Choleraesuis var. Kunzendorf	Choleraesuis var Kunzendorf	66	6	34	31	35	14	26	6	8	SPI7-	-	-	+	ND
CY9	SGSC4759	Human	2002	Taiwan	Choleraesuis var. Kunzendorf	Choleraesuis var Kunzendorf	66	6	34	31	35	14	26	6	8	SPI7-	-	-	+	ND
MS	SGSC4767	Human	2000	Taiwan	Choleraesuis var. Kunzendorf	Choleraesuis var Kunzendorf	66	6	34	31	35	14	26	6	8	SPI7-	-	-	+	ND
RKS1228	SGSC4871		1982	USA	Choleraesuis var. Kunzendorf	Choleraesuis var Kunzendorf	66	6	34	31	35	14	26	6	8	SPI7-	-	-	+	ND	A	C
RKS1230	SGSC4873		1981	USA	Choleraesuis var. Kunzendorf	Choleraesuis var Kunzendorf	66	6	34	31	35	14	26	6	8	SPI7-	-	-	+	ND
RKS1244	SGSC4884		1978	Canada	Choleraesuis var. Kunzendorf	Choleraesuis var Kunzendorf	66	6	34	31	35	14	26	6	8	SPI7-	-	-	+	ND
SARB4	SGSC246;/BVLS6321	Swine	1986	USA	Choleraesuis var. Kunzendorf	Choleraesuis var Kunzendorf	66	6	34	31	35	14	26	6	8	SPI7-	-	-	+	ND
SC-B1	SGSC4730	Human	2000	Taiwan	Choleraesuis var. Kunzendorf	Choleraesuis var Kunzendorf	66	6	34	31	35	14	26	6	8	SPI7-	-	-	+	ND
SC-B12	SGSC4740	Human	2000	Taiwan	Choleraesuis var. Kunzendorf	Choleraesuis var Kunzendorf	66	6	34	31	35	14	26	6	8	SPI7-	-	-	+	ND
SC-B13	SGSC4741	Human	2000	Taiwan	Choleraesuis var. Kunzendorf	Choleraesuis var Kunzendorf	66	6	34	31	35	14	26	6	8	SPI7-	-	-	+	ND
SC-B14	SGSC4742	Human	2000	Taiwan	Choleraesuis var. Kunzendorf	Choleraesuis var Kunzendorf	66	6	34	31	35	14	26	6	8	SPI7-	-	-	+	ND
SC-B15	SGSC4743	Human	2000	Taiwan	Choleraesuis var. Kunzendorf	Choleraesuis var Kunzendorf	66	6	34	31	35	14	26	6	8	SPI7-	-	-	+	ND
SC-B18	SGSC4746	Human	2001	Taiwan	Choleraesuis var. Kunzendorf	Choleraesuis var Kunzendorf	66	6	34	31	35	14	26	6	8	SPI7-	-	-	+	ND
SC-B19	SGSC4747	Human	2001	Taiwan	Choleraesuis var. Kunzendorf	Choleraesuis var Kunzendorf	66	6	34	31	35	14	26	6	8	SPI7-	-	-	+	ND
SC-B21	SGSC4749	Human	2001	Taiwan	Choleraesuis var. Kunzendorf	Choleraesuis var Kunzendorf	66	6	34	31	35	14	26	6	8	SPI7-	-	-	+	ND
SC-B22	SGSC4750	Human	2001	Taiwan	Choleraesuis var. Kunzendorf	Choleraesuis var Kunzendorf	66	6	34	31	35	14	26	6	8	SPI7-	-	-	+	ND
SC-B23	SGSC4751	Human	2001	Taiwan	Choleraesuis var. Kunzendorf	Choleraesuis var Kunzendorf	66	6	34	31	35	14	26	6	8	SPI7-	-	-	+	ND
SC-B3	SGSC4732	Human	2000	Taiwan	Choleraesuis var. Kunzendorf	Choleraesuis var Kunzendorf	66	6	34	31	35	14	26	6	8	SPI7-	-	-	+	ND
SC-B5	SGSC4734	Human	2000	Taiwan	Choleraesuis var. Kunzendorf	Choleraesuis var Kunzendorf	66	6	34	31	35	14	26	6	8	SPI7-	-	-	+	ND
SC-B6	SGSC4735	Human	2000	Taiwan	Choleraesuis var. Kunzendorf	Choleraesuis var Kunzendorf	66	6	34	31	35	14	26	6	8	SPI7-	-	-	+	ND
SC-B67	SGSC4770	Human	2000	Taiwan	Choleraesuis var. Kunzendorf	Choleraesuis var Kunzendorf	66	6	34	31	35	14	26	6	8	SPI7-	-	-	+	ND
SC-B7	SGSC4736	Human	2000	Taiwan	Choleraesuis var. Kunzendorf	Choleraesuis var Kunzendorf	66	6	34	31	35	14	26	6	8	SPI7-	-	-	+	ND
SC-B8	SGSC4737	Human	2000	Taiwan	Choleraesuis var. Kunzendorf	Choleraesuis var Kunzendorf	66	6	34	31	35	14	26	6	8	SPI7-	-	-	+	ND
96-08742		Swine	1996	Germany	Choleraesuis	Choleraesuis var Kunzendorf	68	6	36	31	35	14	26	34	8	ND	-	-	weak	+
48-0391	SGSC4908	Human	1948		Choleraesuis var. Kunzendorf	Choleraesuis var Kunzendorf	133	6	36	31	35	14	26	6	55	SPI7-	-	-	+	ND	A	C
04-06787		Swine		Germany	Choleraesuis var. Kunzendorf	Choleraesuis var Kunzendorf	145	6	36	31	35	14	26	6	8	SPI7-	-	-	+	ND
04-06922		Swine		Germany	Choleraesuis var. Kunzendorf	Choleraesuis var Kunzendorf	145	6	36	31	35	14	26	6	8	SPI7-	-	-	+	ND
04-09238		Swine		Germany	Choleraesuis var. Kunzendorf	Choleraesuis var Kunzendorf	145	6	36	31	35	14	26	6	8	SPI7-	-	-	+	ND
04-09483		Swine		Germany	Choleraesuis var. Kunzendorf	Choleraesuis var Kunzendorf	145	6	36	31	35	14	26	6	8	SPI7-	-	-	+	ND
04-7537		Human	2004	Australia	Choleraesuis var. Kunzendorf	Choleraesuis var Kunzendorf	145	6	36	31	35	14	26	6	8	ND	-	-	+	ND	A	C
05-03241		Human		Germany	Choleraesuis var. Kunzendorf	Choleraesuis var Kunzendorf	145	6	36	31	35	14	26	6	8	SPI7-	-	-	+	ND
06-01706		Swine		Germany	Choleraesuis var. Kunzendorf	Choleraesuis var Kunzendorf	145	6	36	31	35	14	26	6	8	SPI7-	-	-	+	ND
06-06789		Human			Choleraesuis var. Kunzendorf	Choleraesuis var Kunzendorf	145	6	36	31	35	14	26	6	8	SPI7-	-	-	+	ND
36K	WS0048	Swine	1885	USA	Choleraesuis var. Kunzendorf	Choleraesuis var Kunzendorf	145	6	36	31	35	14	26	6	8	ND	-	-	+	ND	A	C
5176/85	WS0850	Human	1985	Cameroon	Choleraesuis var. Kunzendorf	Choleraesuis var Kunzendorf	145	6	36	31	35	14	26	6	8	ND	-	-	+	ND	A	C
6447/88	WS0848		1988	Argentina	Choleraesuis var. Kunzendorf	Choleraesuis var Kunzendorf	145	6	36	31	35	14	26	6	8	ND	-	-	+	ND	A	C
8892/98	WS0844	Human	1998	Singapore	Choleraesuis var. Kunzendorf	Choleraesuis var Kunzendorf	145	6	36	31	35	14	26	6	8	ND	-	-	+	ND	A	C
96-01171		Human			Choleraesuis	Choleraesuis var Kunzendorf	145	6	36	31	35	14	26	6	8	ND	-	-	+	+
96-02240		Human	1996	Germany	Choleraesuis	Choleraesuis var Kunzendorf	145	6	36	31	35	14	26	6	8	ND	-	-	+	ND
96-03644		Swine	1996	Germany	Choleraesuis	Choleraesuis var Kunzendorf	145	6	36	31	35	14	26	6	8	ND	-	-	+	ND
97-07869		Swine	1997	Germany	Choleraesuis	Choleraesuis var Kunzendorf	145	6	36	31	35	14	26	6	8	ND	-	-	+	ND
98-04389		Human	1998	Germany	Choleraesuis	Choleraesuis var Kunzendorf	145	6	36	31	35	14	26	6	8	ND	-	-	+	ND
98-05543		Human	1998	Germany	Choleraesuis	Choleraesuis var Kunzendorf	145	6	36	31	35	14	26	6	8	ND	-	-	+	ND
99-07230		Human	1999	Germany	Choleraesuis	Choleraesuis var Kunzendorf	145	6	36	31	35	14	26	6	8	ND	-	-	+	ND
M193			2001	Philippines	Choleraesuis var. kunzendorf	Choleraesuis var Kunzendorf	145	6	36	31	35	14	26	6	8	ND	-	-	+	+
M273			2001	USA	Choleraesuis var. kunzendorf	Choleraesuis var Kunzendorf	145	6	36	31	35	14	26	6	8	ND	-	-	+	+
RKS1222	SGSC4867		1981	Yugoslavia	Choleraesuis var. Kunzendorf	Choleraesuis var Kunzendorf	145	6	36	31	35	14	26	6	8	SPI7-	-	-	+	ND
RKS1223	SGSC4868		1982	Yugoslavia	Choleraesuis var. Kunzendorf	Choleraesuis var Kunzendorf	145	6	36	31	35	14	26	6	8	SPI7-	-	-	+	ND
RKS1226	SGSC4869			Belgium	Choleraesuis var. Kunzendorf	Choleraesuis var Kunzendorf	145	6	36	31	35	14	26	6	8	SPI7-	-	-	+	ND
RKS1227	SGSC4870		1978	USA	Choleraesuis var. Kunzendorf	Choleraesuis var Kunzendorf	145	6	36	31	35	14	26	6	8	SPI7-	-	-	+	ND
RKS1229	SGSC4872		1981	USA	Choleraesuis var. Kunzendorf	Choleraesuis var Kunzendorf	145	6	36	31	35	14	26	6	8	SPI7-	-	-	+	ND
RKS1235	SGSC4877		1974	Switzerland	Choleraesuis var. Kunzendorf	Choleraesuis var Kunzendorf	145	6	36	31	35	14	26	6	8	SPI7-	-	-	+	ND
RKS1236	SGSC4878		1976	Sweden	Choleraesuis var. Kunzendorf	Choleraesuis var Kunzendorf	145	6	36	31	35	14	26	6	8	SPI7-	-	-	+	ND
RKS1237	SGSC4879		1976	Switzerland	Choleraesuis var. Kunzendorf	Choleraesuis var Kunzendorf	145	6	36	31	35	14	26	6	8	SPI7-	-	-	+	ND
RKS1239	SGSC4880		1979	Switzerland	Choleraesuis var. Kunzendorf	Choleraesuis var Kunzendorf	145	6	36	31	35	14	26	6	8	SPI7-	-	-	+	ND
RKS1240	SGSC4881		1977	Sweden	Choleraesuis var. Kunzendorf	Choleraesuis var Kunzendorf	145	6	36	31	35	14	26	6	8	SPI7-	-	-	+	ND
RKS1241	SGSC4882		1977	Sweden	Choleraesuis var. Kunzendorf	Choleraesuis var Kunzendorf	145	6	36	31	35	14	26	6	8	SPI7-	-	-	+	ND
RKS1243	SGSC4883		1981	Canada	Choleraesuis var. Kunzendorf	Choleraesuis var Kunzendorf	145	6	36	31	35	14	26	6	8	SPI7-	-	-	+	ND
RKS1250	SGSC4888			Thailand	Choleraesuis var. Kunzendorf	Choleraesuis var Kunzendorf	145	6	36	31	35	14	26	6	8	SPI7-	-	-	+	ND
RKS1253	SGSC4889			Thailand	Choleraesuis var. s.s.	Choleraesuis var Kunzendorf	145	6	36	31	35	14	26	6	8	SPI7-	-	-	+	ND
RKS1254	SGSC4891			Australia	Choleraesuis var. Kunzendorf	Choleraesuis var Kunzendorf	145	6	36	31	35	14	26	6	8	SPI7-	-	-	+	ND
RKS1256	SGSC4892			USA	Choleraesuis var. Kunzendorf	Choleraesuis var Kunzendorf	145	6	36	31	35	14	26	6	8	SPI7-	-	-	+	ND
RKS1258	SGSC4884			Poland	Choleraesuis var. Kunzendorf	Choleraesuis var Kunzendorf	145	6	36	31	35	14	26	6	8	SPI7-	-	-	+	ND
RKS1259	SGSC4895			Poland	Choleraesuis var. Kunzendorf	Choleraesuis var Kunzendorf	145	6	36	31	35	14	26	6	8	SPI7-	-	-	+	ND
RKS1264	SGSC4897			Romania	Choleraesuis var. Kunzendorf	Choleraesuis var Kunzendorf	145	6	36	31	35	14	26	6	8	SPI7-	-	-	+	ND
37K	WS0049				Choleraesuis var. Kunzendorf	Choleraesuis var Kunzendorf	246	6	36	31	35	84	26	6	8	ND	-	-	+	ND	A	C
RKS1263	SGSC4896			Romania	Choleraesuis var. Kunzendorf	Choleraesuis var Kunzendorf	363	6	129	31	35	14	26	6	8	SPI7-	-	-	+	ND	A	C
211K					Choleraesuis var. Kunzendorf	Choleraesuis var Kunzendorf	497	6	36	31	35	168	26	6	8	ND	-	-	+	ND	A	No amplification
06-5620		Human	2006	French Guiana	Choleraesuis var. Kunzendorf	Choleraesuis var Kunzendorf	630	6	36	31	35	42	26	6	8	ND	-	-	+	ND	A	C
9519/04	WS0851;SC-B39	Human	2004	Taiwan	Choleraesuis var. Kunzendorf	Choleraesuis var Kunzendorf	634	6	34	31	35	229	26	6	8	ND	-	-	+	ND	A	C
H2487			2001	Taiwan	Choleraesuis	Choleraesuis var Kunzendorf monophasic	66	6	34	31	35	14	26	6	8	ND	-	-	+	+
H2490			2001	Taiwan	Choleraesuis	Choleraesuis var Kunzendorf monophasic	66	6	34	31	35	14	26	6	8	ND	-	-	+	+
H2493			2001	Taiwan	Choleraesuis	Choleraesuis var Kunzendorf monophasic	66	6	34	31	35	14	26	6	8	ND	-	-	+	+
H2524			2001	Taiwan	Choleraesuis	Choleraesuis var Kunzendorf monophasic	66	6	34	31	35	14	26	6	8	ND	-	-	+	+
H2531			2001	Taiwan	Choleraesuis	Choleraesuis var Kunzendorf monophasic	66	6	34	31	35	14	26	6	8	ND	-	-	+	+
H2538			2001	Taiwan	Stanley	Choleraesuis var Kunzendorf monophasic	66	6	34	31	35	14	26	6	8	ND	-	-	+	+
11-3450		Human	2011	France	Decatur	Decatur	1581		72	32	36	33	429	79	209	ND	+	+	+	ND
SARB5	RKS1239;IVB651/79;SGSC2462			USA	Decatur	Decatur	67	141	35	32	36	33	27	33	3	SPI7-	+	+	+	ND	B	K
2/84	WS0846	Human	1984	Togo	Decatur	Decatur	631	141	72	32	36	33	27	33	3	ND	+	+	+	ND	B	K
6566/88	WS1047	Human	1988	Australia	Choleraesuis	Decatur	69	142	37	33	37	34	6	9	34	ND	-	+	+	ND	A	B
6567/88	WS0905	Goat	1988	Australia	Choleraesuis	Decatur	69	142	37	33	37	34	6	9	34	ND	-	+	+	ND	A	No amplification
SARB7	RKS4640;IP6562/88;SGSC2464		1988	Australia	Choleraesuis var. Kunzendorf	Decatur	69	142	37	33	37	34	6	9	34	SPI7-	-	+	+	ND	A	B
6563/88	WS0741	Human	1988	Australia	Choleraesuis	Decatur	635	142	37	33	37	34	6	191	34	ND	-	+	+	ND	A	B
98-02313	SGSC4898	Reptile	1998	Germany	Paratyphi C	Decatur	186	144	72	32	10	33	62	74	3	SPI7-	+	+	+	ND	B	K
06-3890		Human	2006	France	Decatur	Decatur	632	144	72	4	141	33	62	74	3	ND	+	+	+	ND	B	K
49-0462	SGSC4899	Swine	1949	Canada	Typhisuis var. Volsdagsen	Decatur	70		38	34	38	35	28	35	4	SPI7-	+	+	+	ND
65-3	SGSC4859		1965		Decatur	Decatur	70		38	34	38	35	28	35	4	SPI7-	+	+	+	ND
SARB70	CDC1426/67;SGSC2527	Swine	1967	USA	Typhisuis	Decatur	70		38	34	38	35	28	35	4	SPI7-	+	+	+	ND
SARB8	RKS4647;631K;SGSC2465			France	Decatur	Decatur	70		38	34	38	35	28	35	4	SPI7-	+	+	+	ND	B	K
1/74	WS0847	Water	1974	France	Decatur	Decatur	633		5	133	141	94	189	101	126	ND	+	+	+	ND	B	J
9761/07	WS1097	Bovine	2007	Norway	Decatur	Decatur	637		39	190	40	72	40	165	183	ND	+	+	+	ND	A	K
1435K	SGSC2710;WS0740				Paratyphi C	Paratyphi C	90	20	48	31	35	14	26	40	44	SPI7+	+	-	+	ND	A	C
61-2	SGSC4858	Human	1961		Paratyphi C var. Orientalis	Paratyphi C	90	20	48	31	35	14	26	40	44	SPI7+	+	-	+	ND
66-1	SGSC4857	Human	1966		Paratyphi C var. Orient	Paratyphi C	90	20	48	31	35	14	26	40	44	SPI7+	+	-	+	ND
66-4	SGSC4860	Human	1966		Paratyphi C var. Hirschfeld	Paratyphi C	90	20	48	31	35	14	26	40	44	SPI7+	+	-	+	ND
E698	SGSC4849	Human	1981	India	Paratyphi C	Paratyphi C	90	20	48	31	35	14	26	40	44	DSPI7+	+	-	+	ND
E700	SGSC4851	Human	1916	Greece	Paratyphi C	Paratyphi C	90	20	48	31	35	14	26	40	44	SPI7+	+	-	+	ND	A	C
E701	SGSC4852	Human	1918	Iraq	Paratyphi C	Paratyphi C	90	20	48	31	35	14	26	40	44	SPI7+	+	-	+	ND
RKS4588	SGSC3000				Paratyphi C	Paratyphi C	90	20	48	31	35	14	26	40	44	SPI7+	+	-	+	ND
RKS4591	SGSC3003				Paratyphi C	Paratyphi C	90	20	48	31	35	14	26	40	44	SPI7+	+	-	+	ND
SARB48	RKS458;/33K;SGSC2289			France	Paratyphi C	Paratyphi C	90	20	48	31	35	14	26	40	44	DSPI7+	+	-	+	ND	A	C
RKS4585	SGSC2998				Paratyphi C	Paratyphi C	114	20	48	31	35	14	26	52	8	DSPI7+	+	-	+	ND	A	C
RKS4595	SGSC3006				Paratyphi C	Paratyphi C	114	20	48	31	35	14	26	52	8	DSPI7+	+	-	+	ND
SARB49	RKS4594;IP2/88;SGSC2290	Human	1988	France	Paratyphi C	Paratyphi C	114	20	48	31	35	14	26	52	8	DSPI7+	+	-	+	ND
32K	WS0302	Human	1914	India	Paratyphi C	Paratyphi C	146	20	48	31	35	14	26	40	8	DSPI7+	+	-	+	ND	A	C
4827/84	WS0845	Human	1984	Madagascar	Paratyphi C	Paratyphi C	146	20	48	31	35	14	26	40	8	SPI7+	+	-	+	ND	A	C
59-9	SGSC4865	Human	1959	East Africa	Paratyphi C	Paratyphi C	146	20	48	31	35	14	26	40	8	DSPI7+	+	-	+	ND
61-7	SGSC4863	Human	1961	East Africa	Paratyphi C	Paratyphi C	146	20	48	31	35	14	26	40	8	DSPI7+	+	-	+	ND
66-10	SGSC4866	Human	1966		Paratyphi C	Paratyphi C	146	20	48	31	35	14	26	40	8	DSPI7+	+	-	+	ND
66-8	SGSC4864	Human	1966		Paratyphi C	Paratyphi C	146	20	48	31	35	14	26	40	8	DSPI7+	+	-	+	ND
7972/93	WS0841	Human	1993	Niger	Paratyphi C	Paratyphi C	146	20	48	31	35	14	26	40	8	DSPI7+	+	-	+	ND	A	C
99-02397	SGSC4855	Human	1999	Angola	Choleraesuis	Paratyphi C	146	20	48	31	35	14	26	40	8	DSPI7+	+	-	+	ND
CN13/87	SGSC2712				Paratyphi C	Paratyphi C	146	20	48	31	35	14	26	40	8	SPI7+	+	-	+	ND
E279	SGSC4847	Human	1996	Zaire	Paratyphi C	Paratyphi C	146	20	48	31	35	14	26	40	8	DSPI7+	+	-	+	ND
E44	SGSC4838	Human	1992	Zaire	Paratyphi C	Paratyphi C	146	20	48	31	35	14	26	40	8	DSPI7+	+	-	+	ND
E48	SGSC4839	Human	1992	Zaire	Paratyphi C	Paratyphi C	146	20	48	31	35	14	26	40	8	DSPI7+	+	-	+	ND
E50	SGSC4840	Human	1992	Zaire	Paratyphi C	Paratyphi C	146	20	48	31	35	14	26	40	8	DSPI7+	+	-	+	ND
E51	SGSC4841	Human	1992	Zaire	Paratyphi C	Paratyphi C	146	20	48	31	35	14	26	40	8	DSPI7+	+	-	+	ND
E52	SGSC4842	Human	1992	Zaire	Paratyphi C	Paratyphi C	146	20	48	31	35	14	26	40	8	DSPI7+	+	-	+	ND
E53	SGSC4843	Human	1992	Zaire	Paratyphi C	Paratyphi C	146	20	48	31	35	14	26	40	8	DSPI7+	+	-	+	ND
E54	SGSC4844	Human	1992	Zaire	Paratyphi C	Paratyphi C	146	20	48	31	35	14	26	40	8	DSPI7+	+	-	+	ND
E55	SGSC4845	Human	1992	Zaire	Paratyphi C	Paratyphi C	146	20	48	31	35	14	26	40	8	DSPI7+	+	-	+	ND
E676	SGSC4848	Human		India	Paratyphi C	Paratyphi C	146	20	48	31	35	14	26	40	8	DSPI7+	+	-	+	ND
E699	SGSC4850	Human	1939	East Africa	Paratyphi C	Paratyphi C	146	20	48	31	35	14	26	40	8	DSPI7+	+	-	+	ND
E702	SGSC4853	Human	1941	Iraq	Paratyphi C	Paratyphi C	146	20	48	31	35	14	26	40	8	DSPI7+	+	-	+	ND
E703	SGSC4854	Human			Paratyphi C	Paratyphi C	146	20	48	31	35	14	26	40	8	SPI7+	+	-	+	ND
RKS1234	SGSC4876		1972	Senegal	Paratyphi C	Paratyphi C	146	20	48	31	35	14	26	40	8	SPI7+	+	-	+	ND
RKS4586	SGSC2999				Paratyphi C	Paratyphi C	146	20	48	31	35	14	26	40	8	DSPI7+	+	-	+	ND
RKS4589	SGSC3001				Paratyphi C	Paratyphi C	146	20	48	31	35	14	26	40	8	DSPI7+	+	-	+	ND
RKS4590	SGSC3002				Paratyphi C	Paratyphi C	146	20	48	31	35	14	26	40	8	DSPI7+	+	-	+	ND
RKS4592	SGSC3005				Paratyphi C	Paratyphi C	146	20	48	31	35	14	26	40	8	SPI7+	+	-	+	ND
RKS4593	SGSC3005				Paratyphi C	Paratyphi C	146	20	48	31	35	14	26	40	8	SPI7+	+	-	+	ND
RKS4596	SGSC3007				Paratyphi C	Paratyphi C	146	20	48	31	35	14	26	40	8	DSPI7+	+	-	+	ND
RKS4597	SGSC3008				Paratyphi C	Paratyphi C	146	20	48	31	35	14	26	40	8	SPI7+	+	-	+	ND
RKS4599	SGSC3009				Paratyphi C	Paratyphi C	146	20	48	31	35	14	26	40	8	SPI7+	+	-	+	ND
RKS4601	SGSC3011				Paratyphi C	Paratyphi C	146	20	48	31	35	14	26	40	8	SPI7+	+	-	+	ND
RKS4602	SGSC3012				Paratyphi C	Paratyphi C	146	20	48	31	35	14	26	40	8	DSPI7+	+	-	+	ND
SA4863	SGSC2861	Human			Paratyphi C	Paratyphi C	146	20	48	31	35	14	26	40	8	DSPI7+	+	-	+	ND
49-1834			1949	Egypt	Paratyphi C	Paratyphi C monophasic	90	20	48	31	35	14	26	40	44	ND	+	-	+	+
38K	WS0744	Swine			Typhisuis	Typhisuis	636	20 DLV	48	14	35	14	26	44	8	ND	-	-	-	-	A	C
61-6	SGSC4862	Swine	1961		Typhisuis	Typhisuis	147	20 DLV 2	48	31	35	14	26	44	47	SPI7-	-	-	-	-
8719/97	WS0758	Swine	1994	USA	Typhisuis	Typhisuis	147	20 DLV 2	48	31	35	14	26	44	47	ND	-	-	-	-	A	C
8722/97	WS0761	Swine	1994	USA	Typhisuis	Typhisuis	147	20 DLV 2	48	31	35	14	26	44	47	ND	-	-	-	-	A	C
8723/97	WS0762	Swine	1994	USA	Typhisuis	Typhisuis	147	20 DLV 2	48	31	35	14	26	44	47	ND	-	-	-	-	A	C
SARB69	RKS3134;CDC277/68;SGSC2526;IP8724/97	Swine	1968	USA	Typhisuis	Typhisuis	147	20 DLV 2	48	31	35	14	26	44	47	ND	-	-	-	-	A	C
RKI 211					Typhisuis	Typhisuis non-motile	147	20 DLV 2	48	31	35	14	26	44	47	ND	-	-	-	-
ND, Not Done
DSPI7+ : A variant of SPI7 containing a 5 kb deletion between pilR and rci
