# Supplementary material for: Multilocus Sequence Typing as a Replacement for Serotyping in Salmonella enterica
Source: PLoS Pathog. 2012 Jun 21;8(6):e1002776. doi: 10.1371/journal.ppat.1002776 (PMC3380943; doi:10.1371/journal.ppat.1002776)
Supplement: Table S8 — Genbank accession codes and sequence groupings of fliC and fljB alleles. (XLS) [file ppat.1002776.s016.xls]

## Sheet: SuppTableGenBankInfo13012011MA
Supplementary Table 8. Genbank accession codes and sequence grouping of fliC and fljB alleles
Strain	Serovar	fliC (accession)	fljB (accession)	Inactivated fljB genes
CDC02296	(1),4,5,12:i:1,2,7		A (AY353272)
CDC010148	4,12:1,2:1,2		A (AY353521)
CDC1982	Derby		A (AY353266)
CDC16	Heidelberg		A (AY353265)
SL476	Heidelberg		A (CP001120)
CDC000462	Litchfield		A (AY353271)
ATCC8388	Muenchen		A (U17173)
CDC000377	Muenchen		A (AY353269)
SL254	Newport		A (CP001113)
ATCC8759	Paratyphi B		A (U17176)
N1343_04	Paratyphi B		A (DQ838331)
N1608_04	Paratyphi B		A (DQ838332)
SPB7	Paratyphi B		A (CP000886)
1388_04	Paratyphi B var. Java		A (DQ838325)
3474_02	Paratyphi B var. Java		A (DQ838326)
N2456_04	Paratyphi B var. Java		A (DQ838335)
N565_04	Paratyphi B var. Java		A (DQ838334)
84	Saintpaul		A (EF599294)
CDC000477	Stanley		A (AY353267)
95	Typhimurium		A (EF599296)
CDC000479	Typhimurium		A (AY353268)
CDC14	Typhimurium		A (AY353264)
LT2	Typhimurium		A (AE006468)
SL3261	Typhimurium		A (AF045151)
SL375	Typhimurium		A (U17177)
FSLS9-102	unknown		A (FJ763347)
ATCC7001	Choleraesuis		C (U17175)
B20	Choleraesuis		C (EU443199)
N1258_99	Paratyphi C		C (DQ838333)
CDC2532	43:e,h:1,5		D (AY353284)
CDC000342	Thompson		D (AY353285)
CDC000476	Thompson		D (AY353286)
CDC000499	Thompson		D (AY353287)
CDC1498	Beaudesert		E (AY353297)
CDC112	Bredeney		E (AY353296)
ATCC10727	Florida		E (U17172)
CDC2518	Give		E (AY353300)
1370_05	Indiana		E (DQ838336)
2322_05	Indiana		E (DQ838337)
38_05	Indiana		E (DQ838327)
6163_04	Indiana		E (DQ838328)
CDC2206	Nola		E (AY353298)
CDC2473	Pomona		E (AY353299)
CVM19633	Schwarzengrund		E (CP001127)
CDC1967	Eingedi		F (AY353276)
CDC1863	Kambole		F (AY353275)
CDC2234	Kambole		F (AY353277)
ST163	Coeln		G (EF570062)
150_05	Agama		H (DQ838343)
CDC513	Agama		H (AY353294)
ATCC9270	Anatum		H (U17171)
CDC1994	Poona		H (AY353355)
CDC91	Poona		H (AY353295)
CDC380	II 17:e,n,x,z15:1,6		I (AY353530)
CDC1186	II 42:e,n,x:1,6		I (AY353528)
CDCAr555	IIIb 40:z39:1,6		I (AY353531)
ATCC9150	Paratyphi A		J (CP000026)
N1996_04	Paratyphi A		J (DQ838330)
N2761_03	Paratyphi A		J (DQ838329)
CDC2201	Bovismorbificans		K (AY353283)
CDC1428	Infantis		K (AY353282)
CDC020017	Rough:r:1,5		K (AY353280)
AF336929	Bury	A (AF336929)
CDC35	Choleraesuis	A (AY353365)
SARB4	Choleraesuis	A (AY649740)
CDC621	Jericho	A (AY353367)
VCMM3420	Paratyphi C	A (AY657000)
211K	Choleraesuis var. Kunzendorf	A (HQ871171)	PCR amplification failed
6567/88	Decatur	A (HQ871195)	PCR amplification failed
6563/88	Decatur	A (HQ871176)	B (HQ871217)
6566/88	Decatur	A (HQ871196)	B (HQ871236)
SARB7	Decatur	A (HQ871166)	B (HQ871208)
CH12440	Choleraesuis	A (AF159459)	C (EU443198)	same IS10 insertion as in SC-B7
8629/96	Choleraesuis s.s.	A (HQ871185)	C (HQ871226)
06-5620	Choleraesuis var. Kunzendorf	A (HQ871168)	C (HQ871210)
04-7537	Choleraesuis var. Kunzendorf	A (HQ871156)	C (HQ871198)
36K	Choleraesuis var. Kunzendorf	A (HQ871169)	C (HQ871211)
37K	Choleraesuis var. Kunzendorf	A (HQ871170)	C (HQ871212)
48-0391	Choleraesuis var. Kunzendorf	A (HQ871162)	C (HQ871204)
5176/85	Choleraesuis var. Kunzendorf	A (HQ871192)	C (HQ871233)
6447/88	Choleraesuis var. Kunzendorf	A (HQ871190)	C (HQ871231)
8892/98	Choleraesuis var. Kunzendorf	A (HQ871186)	C (HQ871227)	unique IS10 insertion in fljB
9519/04	Choleraesuis var. Kunzendorf	A (HQ871193)	C (HQ871234)
9520/04	Choleraesuis var. Kunzendorf	A (HQ871194)	C (HQ871235)
CN231	Choleraesuis var. Kunzendorf	A (HQ871160)	C (HQ871202)	same IS10 insertion as in SC-B7
CY1	Choleraesuis var. Kunzendorf	A (HQ871159)	C (HQ871201)	same IS10 insertion as in SC-B7
RKS1228	Choleraesuis var. Kunzendorf	A (HQ871161)	C (HQ871203)
RKS1263	Choleraesuis var. Kunzendorf	A (HQ871163)	C (HQ871205)
SC-B67	Choleraesuis var. Kunzendorf	A (AE17220)	C (AE17220)	IS10 within fljB (coordinates 2869353-2868025)
1435K	Paratyphi C	A (HQ871175)	C (HQ871216)
32K	Paratyphi C	A (HQ871172)	C (HQ871213)
4827/84	Paratyphi C	A (HQ871187)	C (HQ871228)
7972/93	Paratyphi C	A (HQ871183)	C (HQ871224)
E700	Paratyphi C	A (HQ871157)	C (HQ871199)
RKS4585	Paratyphi C	A (HQ871158)	C (HQ871200)
SARB48	Paratyphi C	A (HQ871173)	C (HQ871214)
SARB49	Paratyphi C	A (CP000857)	C (CP000857)
38K	Typhisuis	A (HQ871178)	C (HQ871219)
8719/97	Typhisuis	A (HQ871179)	C (HQ871220)
8722/97	Typhisuis	A (HQ871180)	C (HQ871221)
8723/97	Typhisuis	A (HQ871181)	C (HQ871222)
SARB69	Typhisuis	A (HQ871182)	C (HQ871223)
9761/07	Decatur	A (HQ871197)	K (HQ871237)
CDC696	Goeteborg	B (AY353368)
SGSC2525	Typhisuis	B (AY649699)
1/74	Decatur	B (HQ871189)	J (HQ871230)
2/84	Decatur	B (HQ871188)	K (HQ871229)
06-3890	Decatur	B (HQ871167)	K (HQ871209)
98-02313	Decatur	B (HQ871164)	K (HQ871206)
SARB5	Decatur	B (HQ871165)	K (HQ871207)
SARB8	Decatur	B (HQ871177)	K (HQ871218)
CDC34	Choleraesuis	C (AY353364)
34K	Choleraesuis s.s.	C (HQ871174)	C (HQ871215)
6631/88	Choleraesuis s.s.	C (HQ871191)	C (HQ871232)
8538/96	Choleraesuis s.s.	C (HQ871184)	C (HQ871225)
CDCAr429	IIIb 41:c:e,n,x,z15	D (AY353369)
CDCAr548	IIIb 57:c:e,n,x,z15	D (AY353370)
CDCAr468	IIIb 57:c:z:z60	D (AY353366)
